# Supplementary material for: Clinicopathologic and prognostic significance of C-reactive protein/albumin ratio in patients with solid tumors: an updated systemic review and meta-analysis
Source: PubMed Central journal article supplement (PMC5862627; doi:10.18632/oncotarget.24172), 2018-01-11
Supplement: oncotarget-09-13934-s001.pdf [file oncotarget-09-13934-s001.pdf]

## **Clinicopathologic and prognostic significance of C-reactive protein/albumin ratio in patients with solid tumors: an updated systemic review and meta-analysis**

### **SUPPLEMENTARY MATERIALS**

**Supplementary Table 1: Main characteristic of the eligible studies.** See Supplementary\_Table\_1
